# Supplementary material for: Best practice management guidelines for fibrous dysplasia/McCune-Albright syndrome: a consensus statement from the FD/MAS international consortium
Source: Springer Nature journal article supplement (doi:10.1186/s13023-019-1102-9), 2019-06-13

# Algorithm surgical approach femur

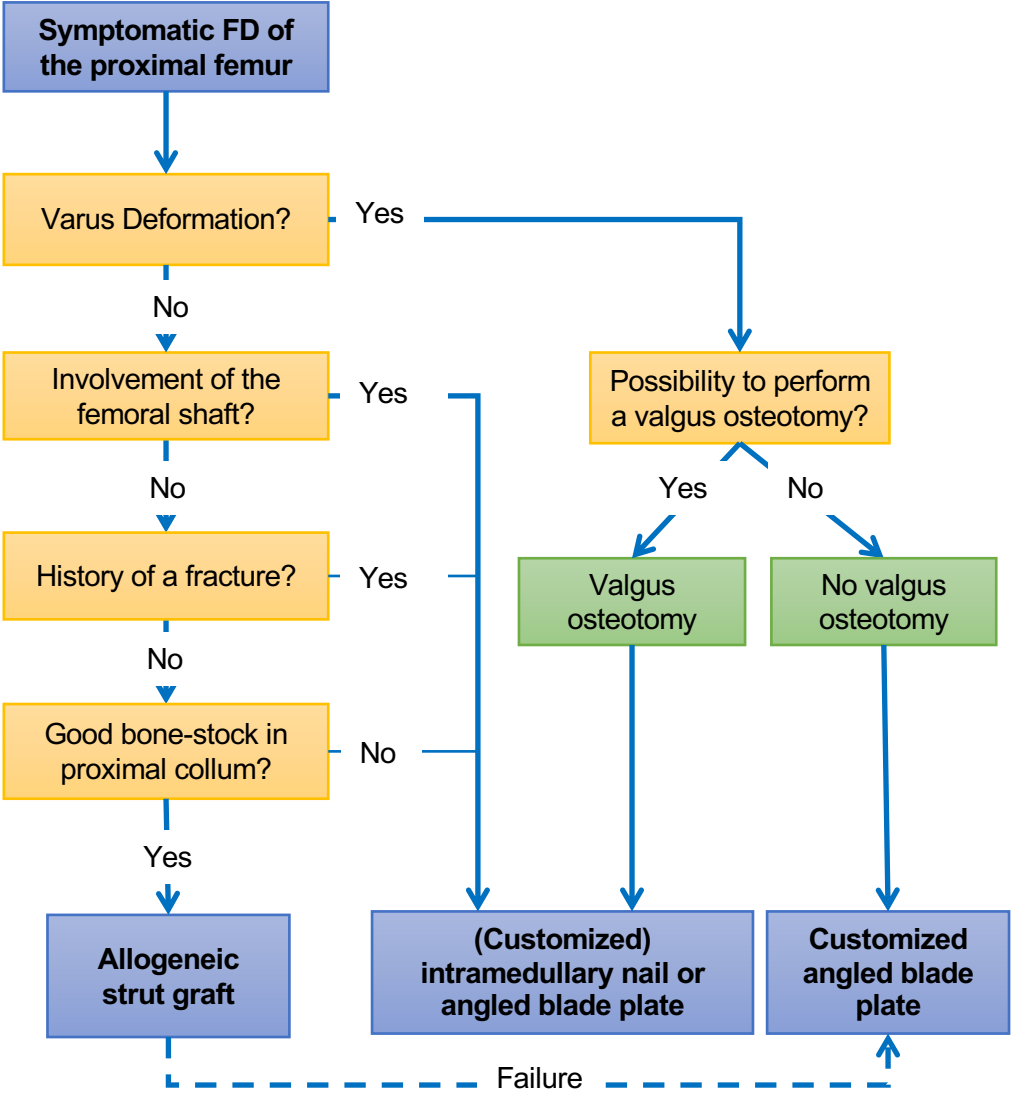

Supplement: MOESM5 [file 16807780]
